# Supplementary material
Source: PubMed Central journal article supplement (PMC7001503)
Supplement: EMBR-21-e49473-s001.pdf [file EMBR-21-e49473-s001.pdf]

## Table Contents

|                    |   |
|--------------------|---|
| Appendix Figure S1 | 2 |
| Appendix Figure S2 | 3 |
| Appendix Figure S3 | 4 |
| Appendix Table S1  | 5 |
| Appendix Table S2  | 6 |
| Appendix Table S3  | 7 |
| Appendix Table S4  | 8 |

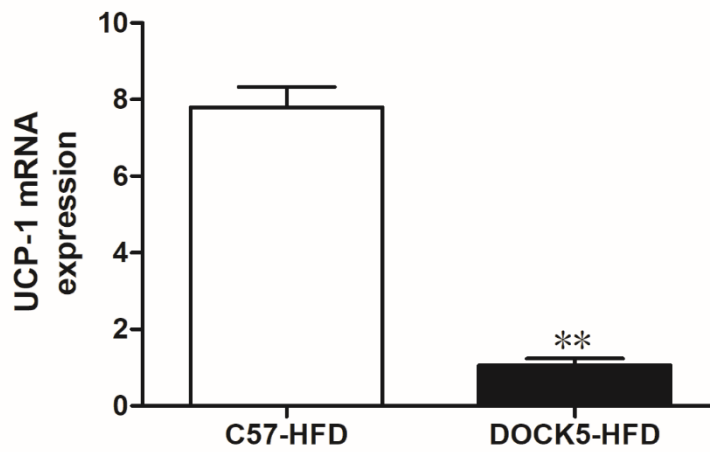

**Appendix Figure S1 UCP1 mRNA expression in the BAT of WT and DOCK5<sup>-/-</sup> mice.**

Data are expressed as the mean ± SEM. P-values were determined with *t*-test, \*\*  $p < 0.01$  vs.

WT.

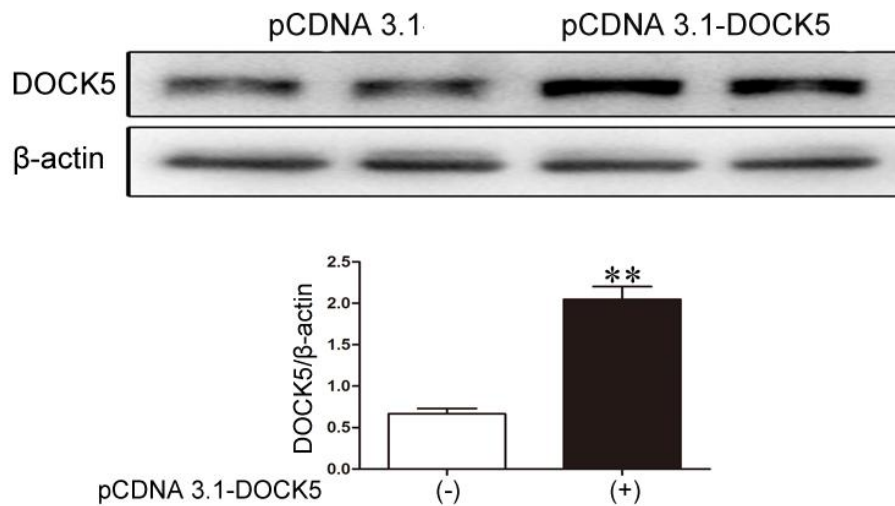

**Appendix Figure S2 DOCK5 protein expression in Hep1-6 cells.**

Hep1-6 cells were infected with pCDNA3.1-DOCK5 (+) or pCDNA3.1 (-) for 48 h. Western blotting was conducted to examine DOCK5 protein expression. Data are presented as the mean  $\pm$  SEM. P-values were determined with *t*-test .\*\*  $p < 0.01$  vs. pCDNA3.1-DOCK5 (-).

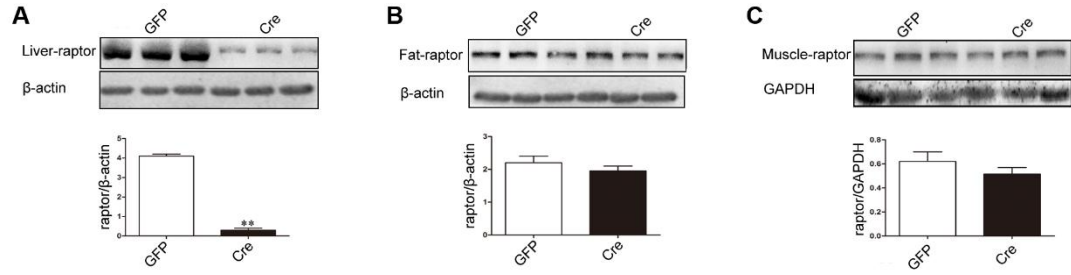

**Appendix Figure S3 Raptor protein expression in AAV8-Cre- or AAV8-GFP-treated**

**Raptor<sup>flox/flox</sup> mice.**

The levels of Raptor protein expression in the

A liver

B adipose

C muscle. Data are presented as the mean  $\pm$  SEM. P-values were determined with *t*-test. \*\* *p*

< 0.01 vs. GFP group.

**Appendix Table S1** Biochemical parameters in WT and DOCK5<sup>-/-</sup> mice

| Parameters   | 3 months   |                         |            |                           | 16 months  |                          |            |                          |
|--------------|------------|-------------------------|------------|---------------------------|------------|--------------------------|------------|--------------------------|
|              | SD -WT     | SD-DOCK5 <sup>-/-</sup> | HFD -WT    | HFD -DOCK5 <sup>-/-</sup> | SD -WT     | SD -DOCK5 <sup>-/-</sup> | HFD -WT    | HFD-DOCK5 <sup>-/-</sup> |
| FBG (mmol/L) | 5.20 ±0.33 | 5.05 ±0.49              | 6.80 ±0.52 | 7.68 ±0.28**              | 6.33 ±0.66 | 6.10 ±0.32               | 11.6 ±1.3  | 14.1 ±0.9**              |
| FINS (mIU/L) | 11.2 ±1.7  | 12.8 ±3.3               | 31.9 ±1.1  | 47.3 ±5.1**               | 18.3 ±2.5  | 16.5 ±3.1                | 77.4 ±6.30 | 88.5 ±3.4**              |
| TC (mmol/L)  | 2.18 ±0.17 | 2.21 ±0.14              | 2.99 ±0.39 | 5.11 ±0.57**              | 2.43 ±0.24 | 2.39 ±0.32               | 6.84 ±0.73 | 8.20 ±0.87*              |
| TG (mmol/L)  | 0.49 ±0.10 | 0.48 ±0.10              | 0.75 ±0.09 | 0.95 ±0.11*               | 0.55 ±0.07 | 0.53 ±0.04               | 1.80 ±0.31 | 2.46 ±0.22**             |
| FFA (mmol/L) | 0.18 ±0.03 | 0.22 ±0.04              | 0.51 ±0.14 | 0.82 ±0.15*               | 0.23 ±0.01 | 0.27 ±0.03               | 1.51 ±0.20 | 2.13 ±0.32*              |

SD, standard diet; HFD, high fat diet; FBG, fasting blood glucose; FIns, fasting plasma insulin; TC, total cholesterol; TG, triglyceride; FFA, free fatty acids.

Data are presented as means ±SD, P-values were determined with *t*-test . \**p* < 0.05, \**p* < 0.01 vs. HFD-WT.

**Appendix Table S2** Biochemical parameters in WT and DOCK5<sup>-/-</sup> mice during the HEC

| Index               | SD-WT<br>(N = 6) | SD-DOCK5 <sup>-/-</sup><br>(N = 6) | HFD-WT<br>(N = 6) | HFD-DOCK5 <sup>-/-</sup><br>(N = 6) |
|---------------------|------------------|------------------------------------|-------------------|-------------------------------------|
| <b>Basal-state</b>  |                  |                                    |                   |                                     |
| BG (mmol/L)         | 5.43 ±0.15       | 5.91 ±0.19                         | 7.02 ±0.16        | 7.92 ±0.31**                        |
| Ins (mIU/L)         | 11.0 ±1.7        | 11.2 ±2.0                          | 30.9 ±2.0         | 48.8 ±3.1**                         |
| TC (mmol/L)         | 2.21 ±0.14       | 2.23 ±0.09                         | 2.87 ±0.21        | 5.06 ±0.51**                        |
| TG (mmol/L)         | 0.47 ±0.07       | 0.49 ±0.09                         | 0.73 ±0.06        | 0.97 ±0.10**                        |
| FFA ( mmol/L)       | 0.21 ±0.04       | 0.23 ±0.05                         | 0.48 ±0.07        | 0.79 ±0.10**                        |
| <b>Steady-state</b> |                  |                                    |                   |                                     |
| BG (mmol/L)         | 5.91 ±0.19       | 6.02 ±0.20                         | 5.81 ±0.36        | 5.98 ±0.19                          |
| Ins (mIU/L)         | 80.5 ±10.7       | 108.6 ±19.3                        | 240.6 ±26.9       | 356.3 ±32.1**                       |
| TC (mmol/L)         | 1.05 ±0.10       | 1.11 ±0.08                         | 1.39 ±0.12        | 2.41 ±0.06**                        |
| TG (mmol/L)         | 0.16 ±0.07       | 0.18 ±0.04                         | 0.37 ±0.09        | 0.52 ±0.08*                         |
| FFA ( mmol/L)       | 0.11 ±0.06       | 0.13 ±0.04                         | 0.24 ±0.06        | 0.39 ±0.07**                        |

FBG, fasting blood glucose; FIns, fasting plasma insulin; TC, total cholesterol; TG, triglyceride; FFA, free fatty acids; Data are presented as means ± SD, P-values were determined with *t*-test .\*\**P* < 0.01 vs. HFD-WT.

**Appendix Table S3** Biochemical parameters in HFD-fed Raptor<sup>f/f</sup> mice during the HEC

| Index               | GFP<br>(n=6) | <i>shDOCK5</i><br>(n=6) | <i>shDOCK5</i> +Cre<br>(n=6) |
|---------------------|--------------|-------------------------|------------------------------|
| <b>Basal-state</b>  |              |                         |                              |
| FBG (mmol/L)        | 7.40 ± 0.31  | 8.78 ± 0.20**           | 7.90 ± 0.30 <sup>▲▲</sup>    |
| FIns (mIU/L)        | 33.3 ± 2.51  | 44.3 ± 4.10**           | 38.2 ± 2.84 <sup>▲▲</sup>    |
| TC (mmol/L)         | 2.83 ± 0.22  | 5.01 ± 0.31**           | 3.85 ± 0.42 <sup>▲▲</sup>    |
| TG (mmol/L)         | 0.71 ± 0.08  | 0.86 ± 0.06**           | 0.76 ± 0.07 <sup>▲</sup>     |
| FFA ( mmol/L)       | 0.56 ± 0.04  | 0.81 ± 0.05**           | 0.68 ± 0.06 <sup>▲▲</sup>    |
| <b>Steady-state</b> |              |                         |                              |
| FBG (mmol/L)        | 5.91 ± 0.32  | 5.94 ± 0.16             | 5.85 ± 0.17                  |
| Ins (mIU/L)         | 256.3 ± 27.3 | 348.4 ± 35.2**          | 297.2 ± 24.3 <sup>▲▲</sup>   |
| TC (mmol/L)         | 1.23 ± 0.14  | 2.35 ± 0.08**           | 1.89 ± 0.09 <sup>▲▲</sup>    |
| TG (mmol/L)         | 0.31 ± 0.07  | 0.48 ± 0.06**           | 0.40 ± 0.05 <sup>▲</sup>     |
| FFA ( mmol/L)       | 0.16 ± 0.03  | 0.41 ± 0.05**           | 0.30 ± 0.06 <sup>▲▲</sup>    |

GFP, AAV8-GFP; *shDOCK5*, AAV8-*shDOCK5*; Cre, AAV8-Cre; FBG, fasting blood glucose; FIns, fasting plasma insulin; TC, total cholesterol; TG, triglyceride; FFA, free fatty acids; Data are presented as means ± SD, P-values were determined with one way ANOVA \*\*  $P < 0.01$  vs. GFP group; <sup>▲</sup> $P < 0.05$ , <sup>▲▲</sup> $P < 0.01$  vs. *shDOCK5* group.

**Appendix Table S4** Specific primers used for RT-PCR analyses

| Gene          | Forward (5'-3')         | Reverse (5'-3')        |
|---------------|-------------------------|------------------------|
| DOCK5         | GGGGTTGCCATCTACAACACTAC | AGCCCTCATAACATCTCCAGGA |
| G6Pase        | GTATTGTCTCATCACCATCTTC  | CGCTCACACCATCTCTTAG    |
| PEPCK         | TAGGAGCAGCCATGAGAT      | CGAAGTTGTAGCCGAAGA     |
| UCP1          | CTTCCCCTGGACT           | TTTCGGCAATCCTTCT       |
| GAPDH         | TGTGTCCGTCGTGGATCTGA    | CCTGCTTCACCACCTTCTTGAT |
| $\beta$ actin | GCTGTCCCTGTATGCCTCT     | GATGTCACGCACGATTTCC    |

DOCK5, dedicator of cytokinesis 5; G6Pase, glucose-6-phosphatase; PEPCK, phosphoenolpyruvate carboxykinase; UCP1, uncoupling protein 1; GAPDH, Glyceraldehyde 3-phosphate dehydrogenase;  $\beta$  actin, beta Actin

;
