# Supplementary material
Source: PubMed Central journal article supplement (PMC7001503)
Supplement: EMBR-21-e49473-s002.pdf [file EMBR-21-e49473-s002.pdf]

## Expanded View Figures

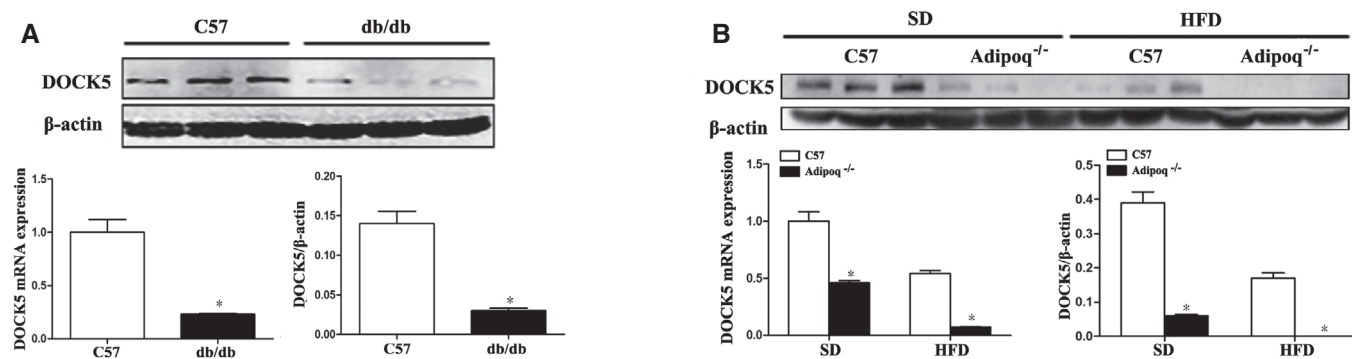

**Figure EV1. Hepatic DOCK5 is down-regulated in insulin-resistant and obese mice.**

A DOCK5 mRNA and protein expression in the livers of db/db and C57BL/6j mice.

B DOCK5 mRNA and protein expression in the livers of SD- or HFD-fed C57BL/6j and Adipoq<sup>-/-</sup> mice. SD, standard chow diet; HFD, high-fat diet. Data are expressed as the mean  $\pm$  SEM ( $n = 3$  for each group).  $P$ -values were determined with  $t$ -test, \* $P < 0.01$  compared with C57BL/6j mice.

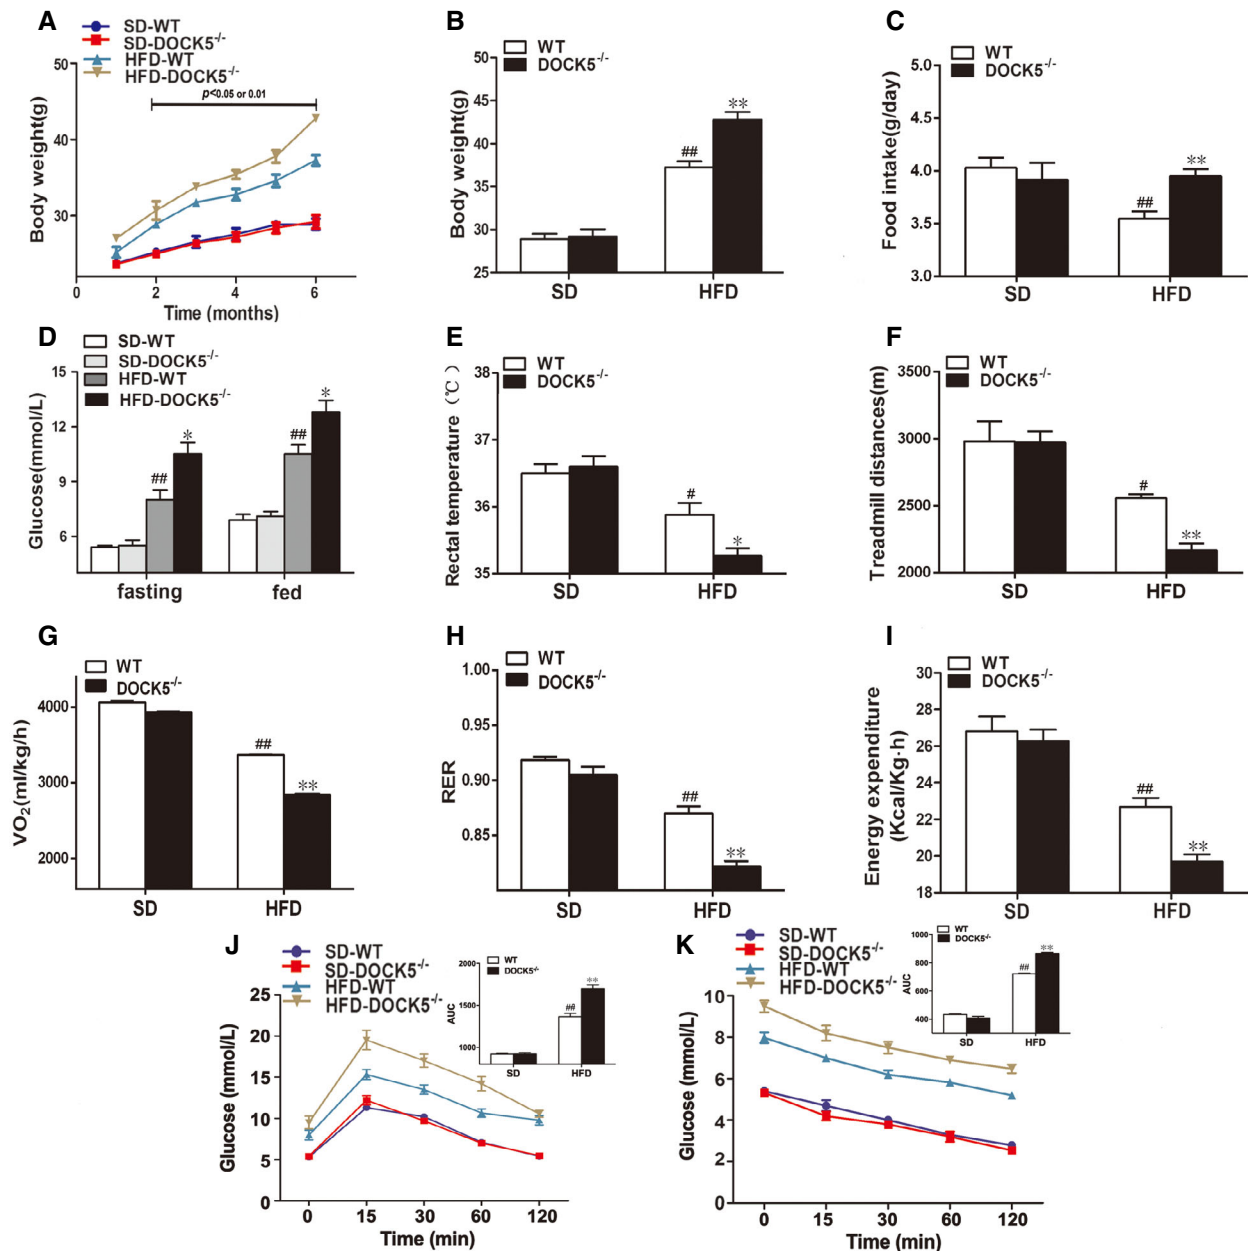

**Figure EV2. Changes in body weight and energy expenditure in 8-month-old mice.**

Eight-week-old male WT and *DOCK5*<sup>-/-</sup> mice were fed a SD or a HFD for 6 months.

- A Body weight curve.
- B Cumulative body weight.
- C Average daily food intake.
- D Fasting and fed blood glucose.
- E Rectal temperature.
- F Locomotor tolerance.
- G  $V_{O_2}$ .
- H RER.
- I Energy expenditure.
- J GTTs.
- K ITTs.

Data information: SD, standard chow diet; HFD, high-fat diet;  $V_{O_2}$ , 24-h oxygen consumption; RER, respiratory exchange ratio. Data are expressed as the mean  $\pm$  SEM (n = 5–6 for each group). P-values were determined with two-way ANOVA. #P < 0.05, ##P < 0.01 versus SD-WT; \*P < 0.05, \*\*P < 0.01 versus HFD-WT.

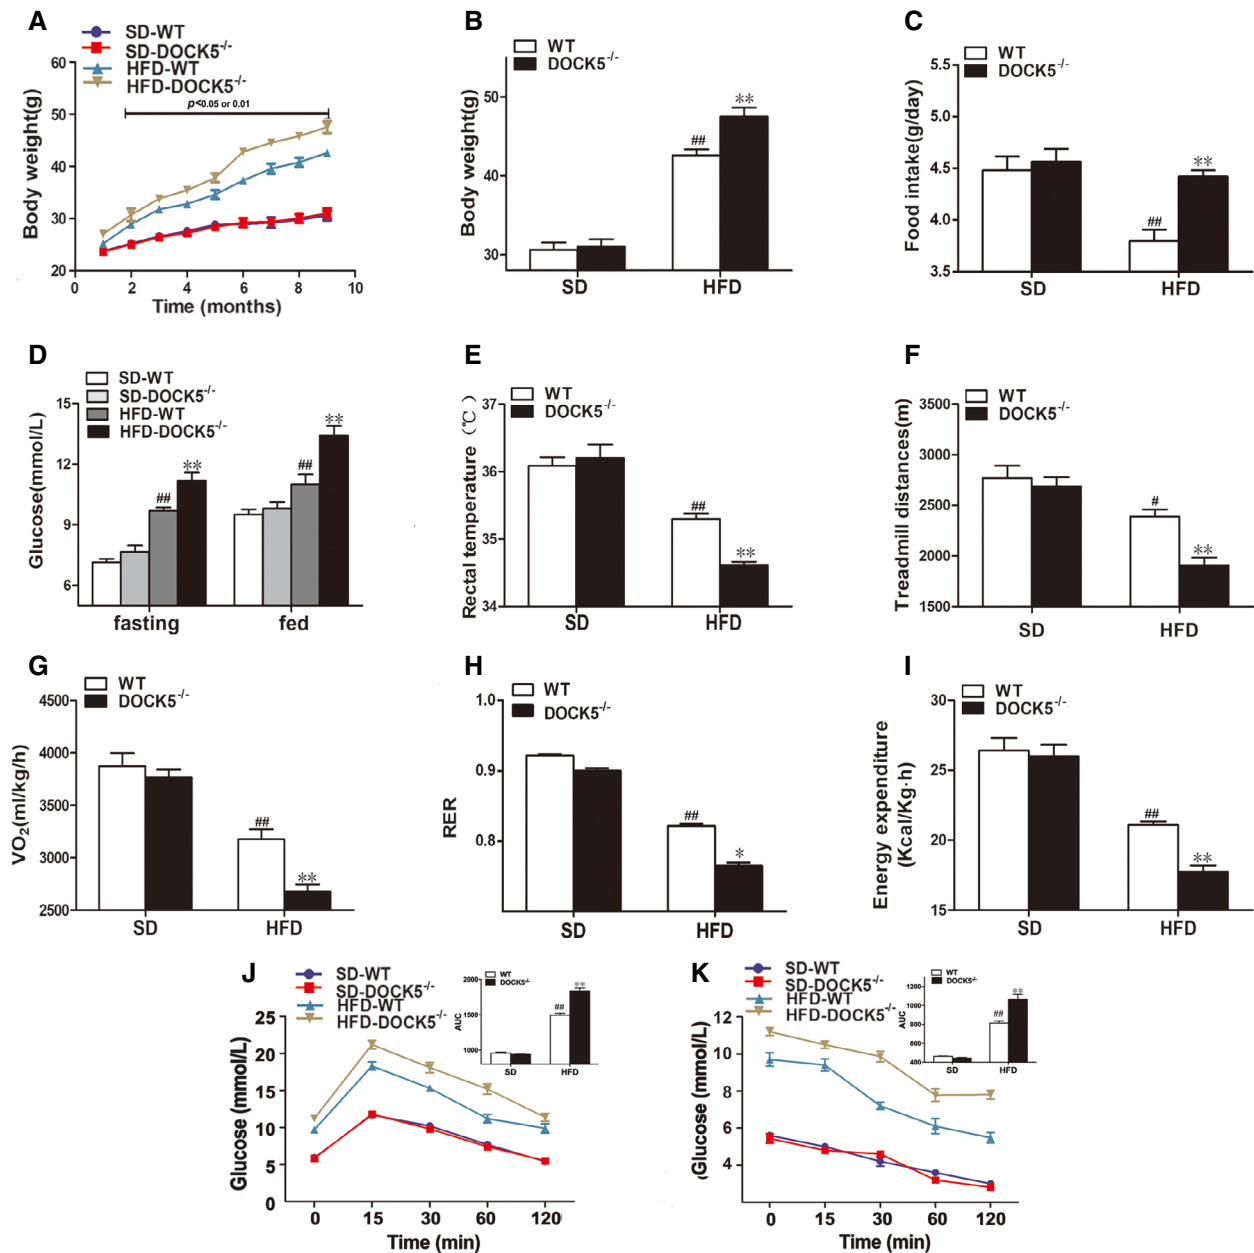

**Figure EV3. Changes in body weight and energy expenditure in 11-month-old mice.**

Eight-week-old male WT and DOCK5<sup>-/-</sup> mice were fed a SD or a HFD for 9 months.

- A Body weight curve.
- B Cumulative body weight.
- C Average daily food intake.
- D Fasting and fed blood glucose.
- E Rectal temperature.
- F Locomotor tolerance.
- G  $VO_2$ .
- H RER.
- I Energy expenditure.
- J GTTs.
- K ITTs.

Data information: SD, normal chow diet; HFD, high-fat diet. Data are expressed as the mean  $\pm$  SEM ( $n = 5-6$  for each group).  $P$ -values were determined with two-way ANOVA. # $P < 0.05$ , ## $P < 0.01$  versus SD-WT; \* $P < 0.05$ , \*\* $P < 0.01$  versus HFD-WT.

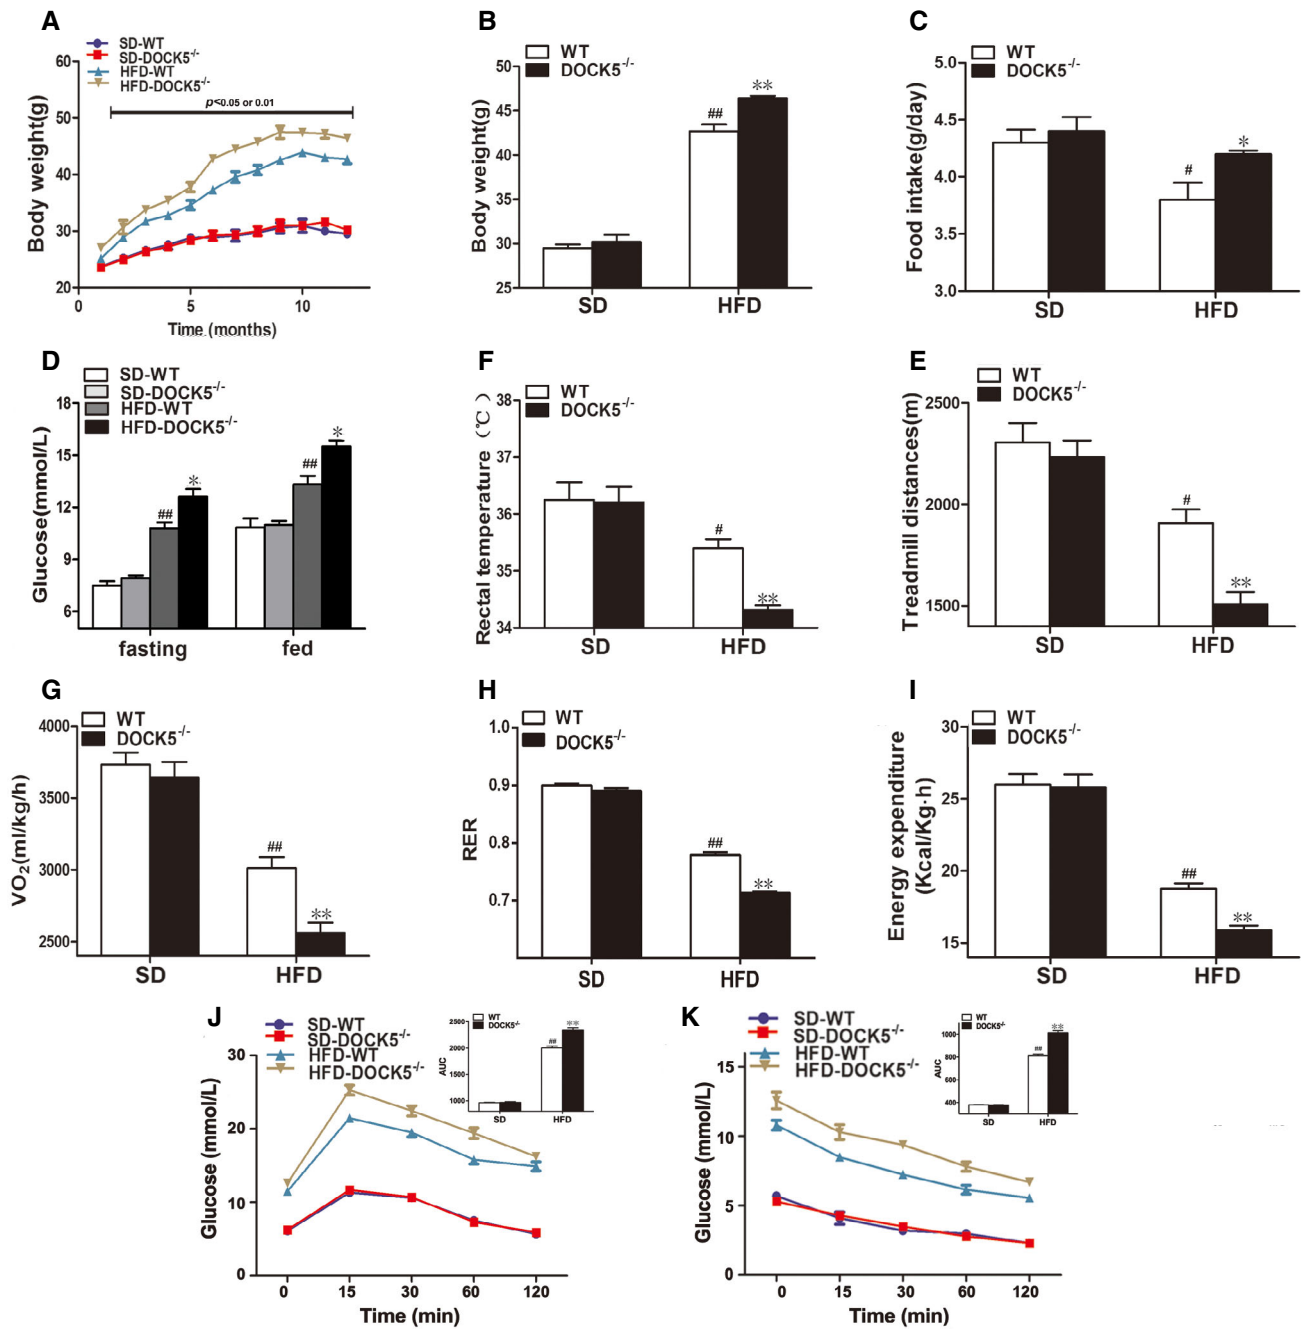

**Figure EV4. Changes in body weight and energy expenditure in 14-month-old mice.**

Eight-week-old male WT and DOCK5<sup>-/-</sup> mice were fed a SD or a HFD for 12 months.

- A Body weight curve.
- B Cumulative body weight.
- C Average daily food intake.
- D Fasting and fed blood glucose.
- E Rectal temperature.
- F Locomotor tolerance.
- G  $VO_2$ .
- H RER.
- I Energy expenditure.
- J GTTs.
- K ITTs.

Data information: SD, standard chow diet; HFD, high-fat diet. Data are expressed as the mean  $\pm$  SEM ( $n = 6$  for each group).  $P$ -values were determined with two-way ANOVA. ## $P < 0.05$ , ### $P < 0.01$  versus SD-WT; \* $P < 0.05$ , \*\* $P < 0.01$  versus HFD-WT.

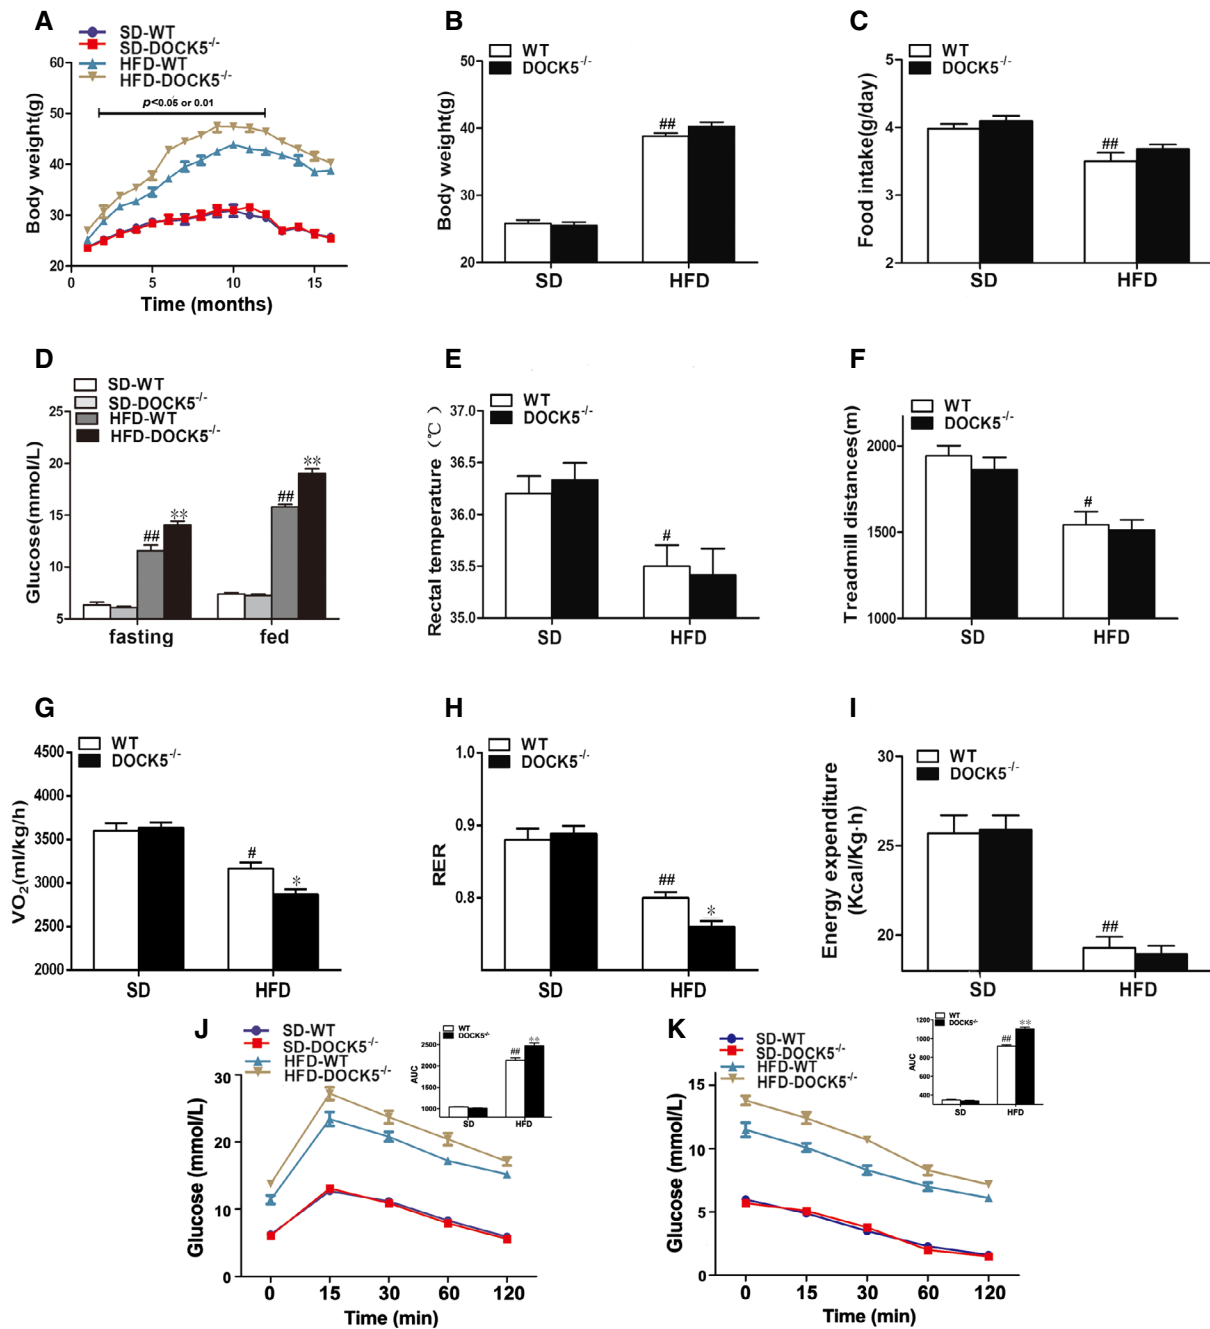

**Figure EV5. Changes in body weight and energy expenditure in 18-month-old mice.**

Eight-week-old male WT and DOCK5<sup>-/-</sup> mice were fed a SD or a HFD for 16 months.

- A Body weight curve.
- B Cumulative body weight.
- C Average daily food intake.
- D Fasting and fed blood glucose.
- E Rectal temperature.
- F Locomotor tolerance.
- G  $VO_2$ .
- H RER.
- I Energy expenditure.
- J GTTs.
- K ITTs.

Data information: SD, standard chow diet; HFD, high-fat diet. Data are expressed as the mean  $\pm$  SEM ( $n = 5-6$  for each group). # $P < 0.05$ , ## $P < 0.01$  versus SD-WT;  $P$ -values were determined with two-way ANOVA. \* $P < 0.05$ , \*\* $P < 0.01$  versus HFD-WT.
